# Supplementary material for: Understanding the mechanisms of green tea EGCG against amyloid β oligomer neurotoxicity through computational studies
Source: Royal Society of Chemistry journal article supplement (doi:10.1039/d4ra03343d), 2024-01-01
Supplement: d4ra03343d1.pdf [file d4ra03343d1.pdf]

## DATA AVAILABILITY

# Understanding the Mechanisms of Green Tea EGCG against Amyloid $\beta$ Oligomer Neurotoxicity through Computational Studies

Priscila Baltazar Gonçalves, Yraima Cordeiro and Ana Carolina Rennó Sodero

### Data Availability Statement:

Data for this article, including all computational simulations performed, are available at the Zenodo Repository at the following links:

*Molecular Docking Data available in:*

[Docking Studies of Green Tea Catechins with Amyloid  \$\beta\$  Peptide Oligomers \(zenodo.org\)](#)

*Molecular Dynamics Data available in:*

[Oligomer alone \(md1\) \(zenodo.org\)](#)

[Oligomer alone \(md2\) \(zenodo.org\)](#)

[EGCG-oligomer in P0 \(md1\) \(zenodo.org\)](#)

[EGCG-oligomer in P0 \(md2\) \(zenodo.org\)](#)

[EGCG-oligomer in P1 \(md1\) \(zenodo.org\)](#)

[EGCG-oligomer in P1 \(md2\) \(zenodo.org\)](#)

[EGCG-oligomer in P2 \(md1\) \(zenodo.org\)](#)

[EGCG-oligomer in P2 \(md2\) \(zenodo.org\)](#)

[EC-oligomer in P0 \(md1\) \(zenodo.org\)](#)

[EC-oligomer in P0 \(md2\) \(zenodo.org\)](#)

[EC-oligomer in P1 \(md1\) \(zenodo.org\)](#)

[EC-oligomer in P1 \(md2\) \(zenodo.org\)](#)

[EC-oligomer in P2 \(md1\) \(zenodo.org\)](#)

[EC-oligomer in P2 \(md2\) \(zenodo.org\)](#)
